# Supplementary material for: Spatial Proteomics Reveals Alcohol-Induced Damages to the Crypts and Villi of the Mouse Small Intestine
Source: PubMed Central journal article supplement (PMC11077582; doi:10.1021/acs.jproteome.4c00037), 2024-04-24
Supplement: pr4c00037_si_001.pdf [file pr4c00037_si_001.pdf]

# Spatial Proteomics Reveals Alcohol-Induced Damages to the Crypts and Villi of the Mouse Small Intestine

Patil Shivprasad Suresh,<sup>1</sup> Xinguo Sun,<sup>1</sup> Zhanxiang Zhou,<sup>1,3</sup> Qibin Zhang<sup>1,2\*</sup>

<sup>1</sup>Center for Translational Biomedical Research, University of North Carolina at Greensboro, North Carolina Research Campus, Kannapolis, NC 28081, USA.

<sup>2</sup>Department of Chemistry & Biochemistry, University of North Carolina at Greensboro, Greensboro, NC 27402, USA.

<sup>3</sup>Department of Nutrition, University of North Carolina at Greensboro, Greensboro, North Carolina 27402, USA.

## Corresponding Author

Email: [q\\_zhang2@uncg.edu](mailto:q_zhang2@uncg.edu)

## Table of Contents

| Item             | Title                                                                                                                                                                                                               | Page Number |
|------------------|---------------------------------------------------------------------------------------------------------------------------------------------------------------------------------------------------------------------|-------------|
| <b>Figure S1</b> | (a) The effects of alcohol on the integrity of intestinal tissues. (b) Number of identified proteins from each group (AF and PF, equivalent to 3000 cells).                                                         | <b>S2</b>   |
| <b>Figure S2</b> | The functions of commonly identified proteins in AF and PF.                                                                                                                                                         | <b>S3</b>   |
| <b>Figure S3</b> | Protein-protein interaction network of uniquely expressed proteins in AF and PF samples. Top five biological processes from functional enrichment analysis of the uniquely expressed proteins in AF and PF samples. | <b>S4</b>   |
| <b>Table S1</b>  | Number of identified proteins in crypts and villi of AF and PF mice.                                                                                                                                                | <b>S5</b>   |
| <b>Table S2</b>  | Identified proteins in crypts and villi of AF and PF mice.                                                                                                                                                          | <b>XLSX</b> |
| <b>Table S3</b>  | Statistically significantly changed proteins in crypts and villi between AF and PF mice.                                                                                                                            | <b>XLSX</b> |

**Supplementary Figure S1.** (a) The effects of alcohol on the integrity of intestinal tissues. Villi regions are damaged in alcohol-fed (alcohol-treated) mice. (b) Number of identified proteins from each group (AF and PF, equivalent to 3000 cells). DIA-NN was used to process the DIA datasets.

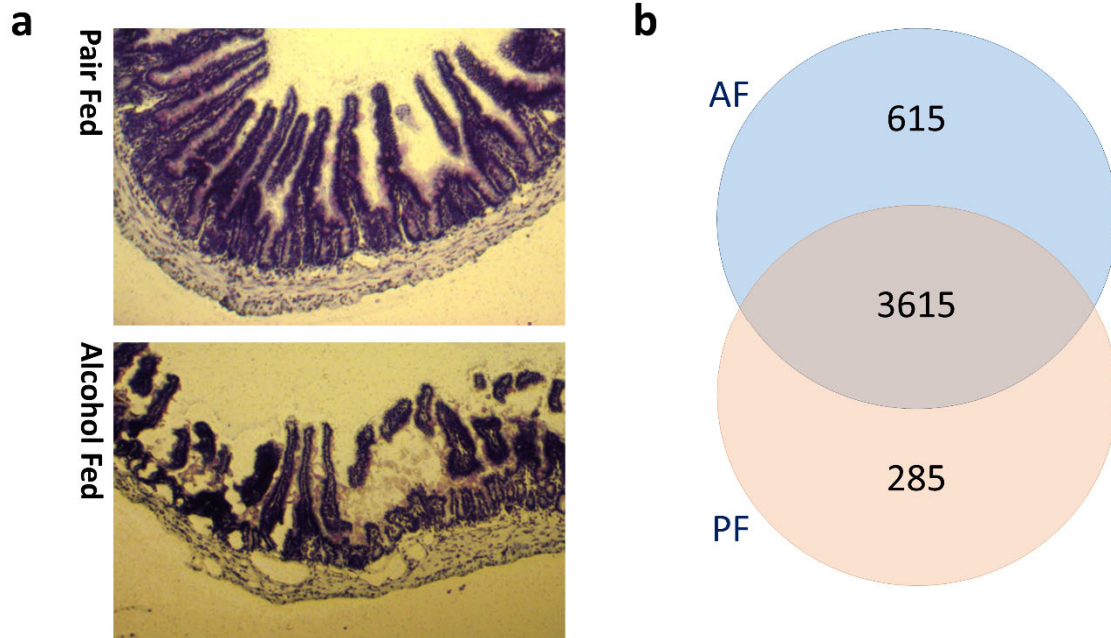

**Supplementary Figure S2.** The functions of commonly identified proteins in AF and PF.

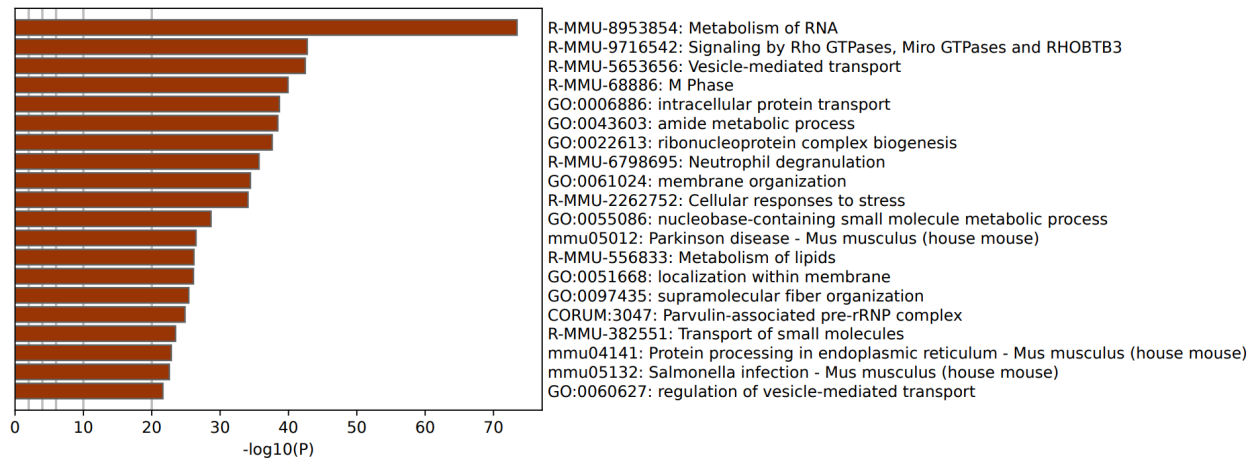

**Supplementary Figure S3.** Protein-protein interaction network of uniquely expressed proteins in AF and PF samples. Top five biological processes from functional enrichment analysis of the uniquely expressed proteins in AF and PF samples.

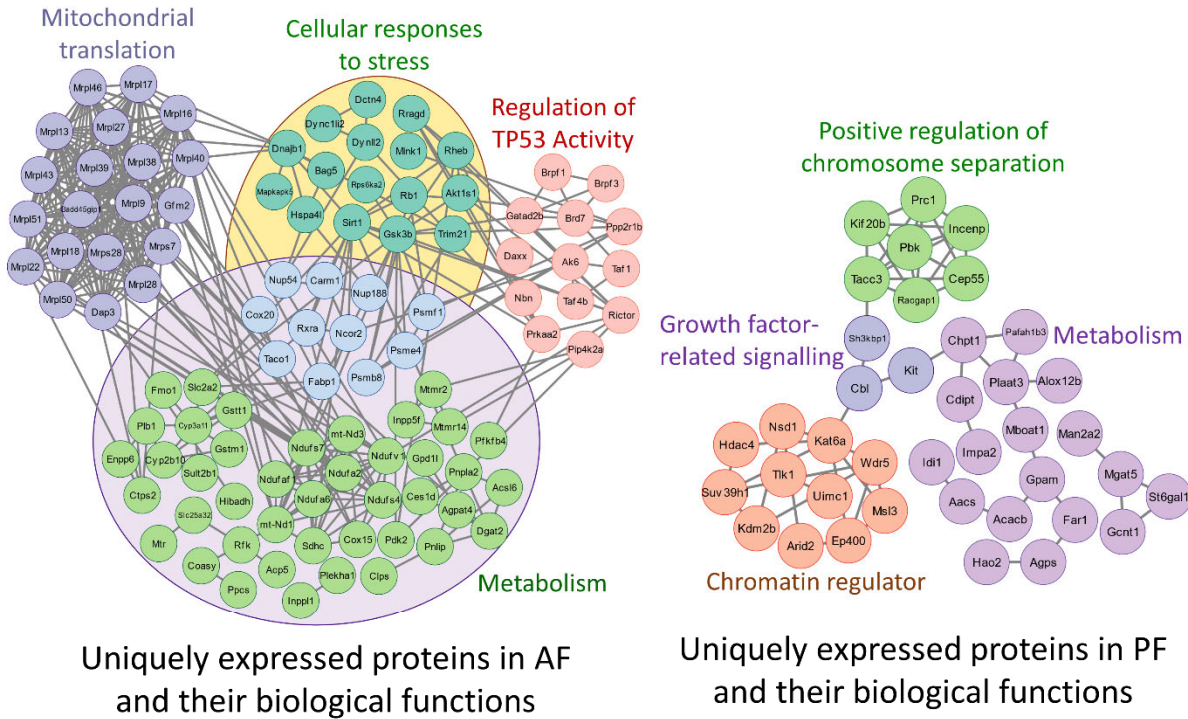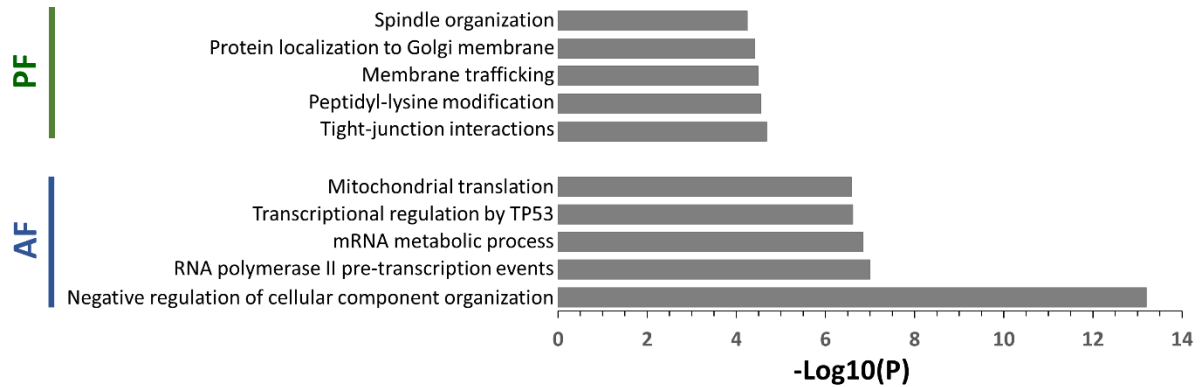

**Supplementary Table S1:** Number of identified proteins in crypts and villi of AF and PF mice.

| <b>Mouse</b> | <b>AF (Treatment)</b> |                 | <b>Mouse</b> | <b>PF (Control)</b> |                 |
|--------------|-----------------------|-----------------|--------------|---------------------|-----------------|
|              | <b>Crypts</b>         | <b>Villi</b>    |              | <b>Crypts</b>       | <b>Villi</b>    |
|              | No. of proteins       | No. of proteins |              | No. of proteins     | No. of proteins |
| <b>1</b>     | 3622                  | 3957            | <b>1</b>     | 3875                | 3381            |
| <b>2</b>     | 2644                  | 4031            | <b>2</b>     | 3498                | 3644            |
| <b>3</b>     | 3152                  | 3738            | <b>3</b>     | 3798                | 3758            |
| <b>4</b>     | 3065                  | 3833            | <b>4</b>     | 2993                | 2999            |
| <b>5</b>     | 3240                  | 3420            | <b>5</b>     | 3636                | 3448            |
| <b>6</b>     | 2530                  | 3381            | <b>6</b>     | 2801                | 3863            |
| <b>7</b>     | 3527                  | 3293            | <b>7</b>     | 3021                | 3688            |
| <b>8</b>     | 4070                  | 3902            |              |                     |                 |
| <b>9</b>     | 4085                  | 3709            |              |                     |                 |
